# Supplementary material for: Controllable Nd2Fe14B/α-Fe nanocomposites: chemical synthesis and magnetic properties
Source: Royal Society of Chemistry journal article supplement (doi:10.1039/c4nr02163k), 2014-01-01
Supplement: c4nr02163k1.pdf [file c4nr02163k1.pdf]

## Supporting Information

### Controllable $\text{Nd}_2\text{Fe}_{14}\text{B}/\alpha\text{-Fe}$ Nanocomposites: Chemical Synthesis and Magnetic Properties

*Lianqing Yu<sup>a, b</sup>, Ce Yang<sup>a</sup>, and Yanglong Hou<sup>a, \*</sup>*

<sup>a</sup> Department of Materials Science and Engineering, College of Engineering, Peking University, Beijing 100871, China.

<sup>b</sup> College of Science, China University of Petroleum, Qingdao 266580, China

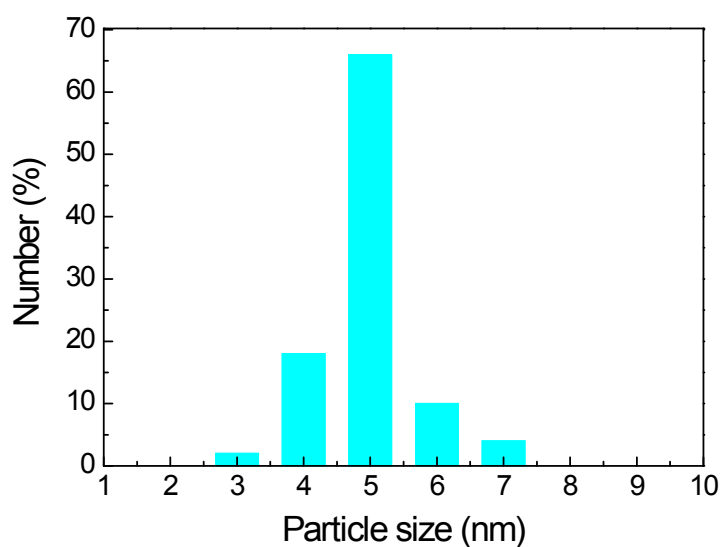

Figure S1. The size distribution histograms of 5 nm  $\alpha\text{-FeNPs}$

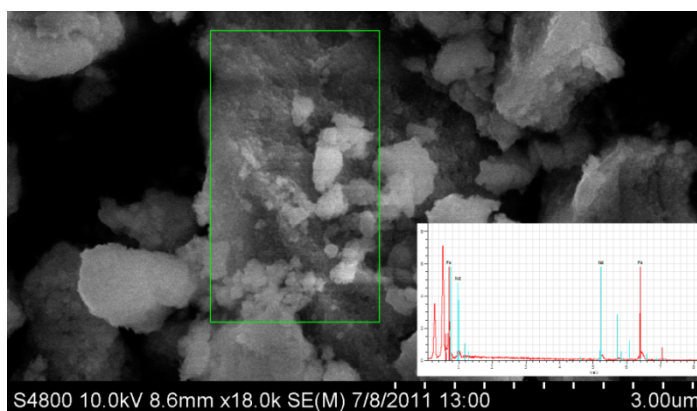

Figure S2. SEM images of  $\text{Nd}_2\text{Fe}_{14}\text{B}/\alpha\text{-Fe}$  nanocomposite powder with total Nd/Fe ratio of 2.6/10. EDS analysis shows the molar ratio of Nd to Fe=1.42:10

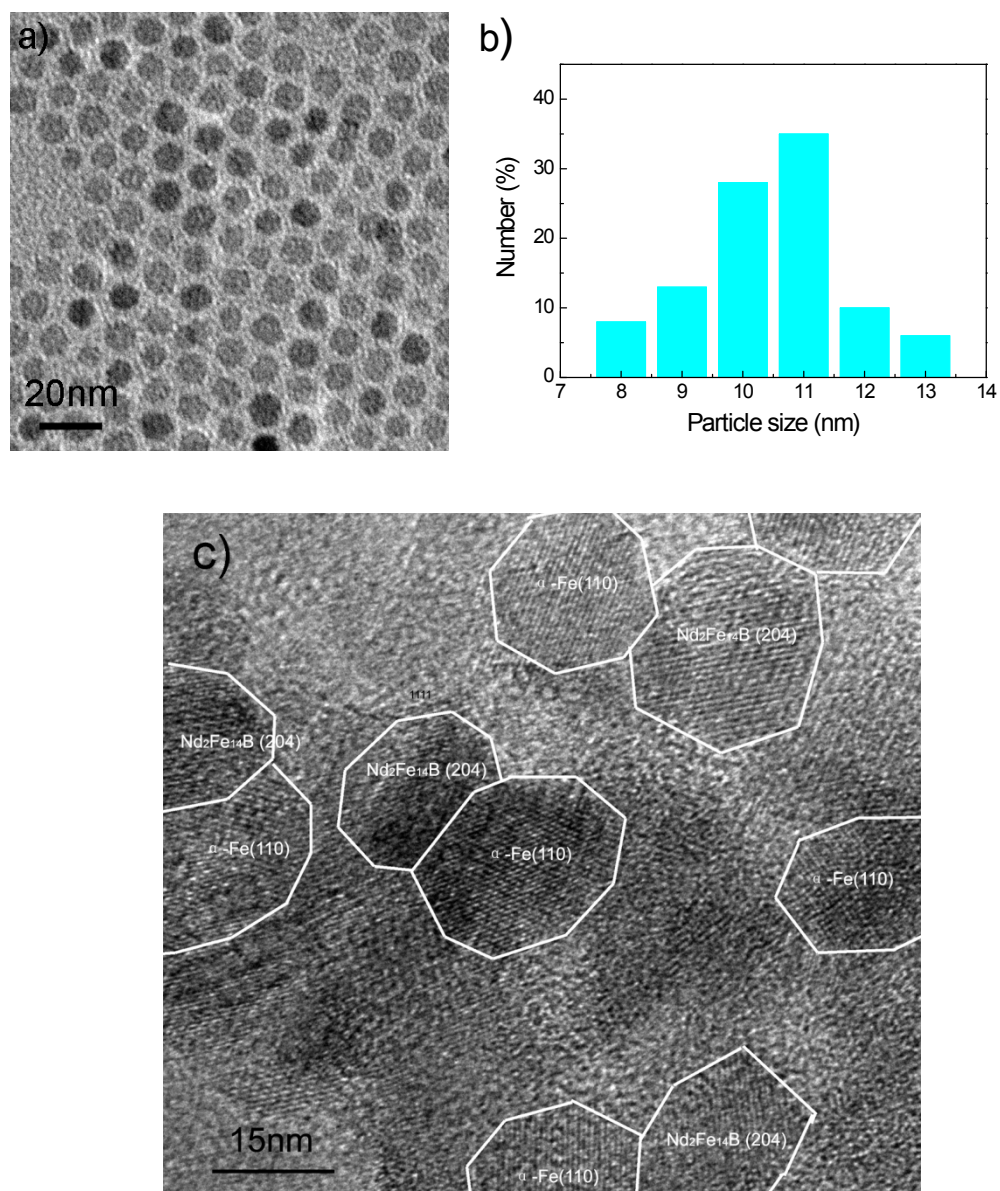

Figure S3  $\alpha$ -Fe NPs with size of 10nm prepared by  $\text{Fe}(\text{CO})_5$  a) SEM, b) size distribution, c) HRTEM of the corresponding nanocomposite.

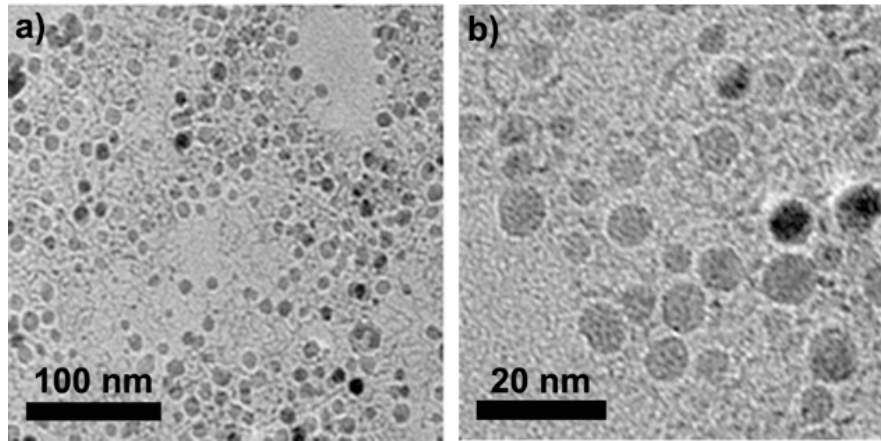

Figure S4. TEM images of Nd-Fe-B-oxide/ $\alpha$ -Fe precursor with total Nd/Fe ratio of 1.3/10.

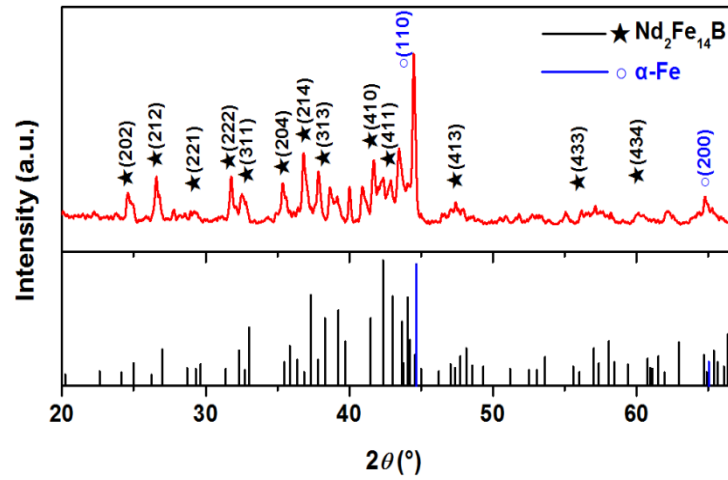

Figure S5. XRD patterns of  $\text{Nd}_2\text{Fe}_{14}\text{B}/\alpha\text{-Fe}$  nanocomposites synthesized from Nd-Fe-B-oxide/ $\alpha$ -Fe precursor with total Nd/Fe ratio of 1.3/10. The nanocomposites can be indexed as a tetragonal structure  $\text{Nd}_2\text{Fe}_{14}\text{B}$  phase (JCPDS No. 36-1296) and  $\alpha$ -Fe phase (JCPDS No. 06-0696).

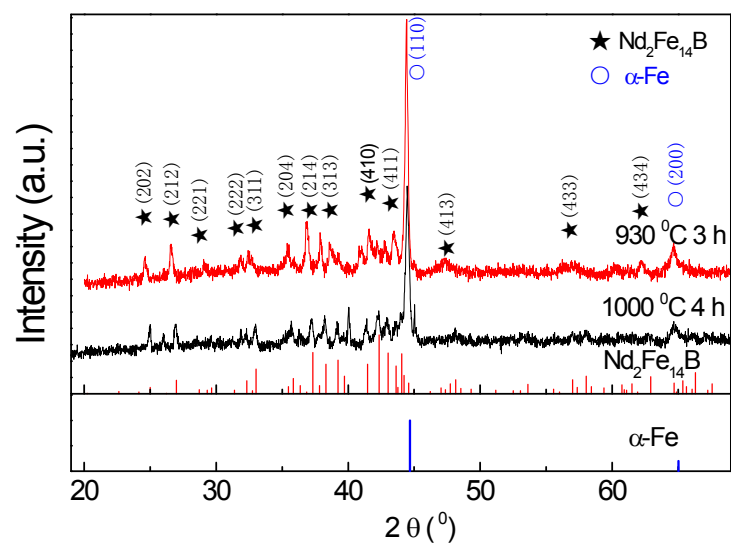

Figure S6. XRD patterns of  $\text{Nd}_2\text{Fe}_{14}\text{B}/\alpha\text{-Fe}$  nanocomposites synthesized from  $\text{Nd-Fe-B-oxide}/\alpha\text{-Fe}$  precursor with total  $\text{Nd/Fe}$  ratio of 2.6/10 under reduction & diffusion process of different temperature and time. The nanocomposites can be indexed as a tetragonal structure  $\text{Nd}_2\text{Fe}_{14}\text{B}$  phase (JCPDS No. 36-1296) and  $\alpha\text{-Fe}$  phase (JCPDS No. 06-0696).
